1 **TeoNAM: a nested association mapping population for domestication and**  
2 **agronomic trait analysis in maize**

3 Qiuyue Chen<sup>\*,†</sup>, Chin Jian Yang<sup>\*</sup>, Alessandra M. York<sup>\*</sup>, Wei Xue<sup>\*,1</sup>, Lora L. Daskalska<sup>\*</sup>,  
4 Craig A. DeValk<sup>\*</sup>, Kyle W. Krueger<sup>\*</sup>, Samuel B. Lawton<sup>\*</sup>, Bailey G. Spiegelberg<sup>\*</sup>, Jack M.  
5 Schnell<sup>\*</sup>, Michael A. Neumeyer<sup>\*</sup>, Joseph S. Perry<sup>\*</sup>, Aria C. Peterson<sup>\*</sup>, Brandon Kim<sup>\*</sup>,  
6 Laura Bergstrom<sup>\*</sup>, Liyan Yang<sup>\*,‡</sup>, Isaac C. Barber<sup>\*</sup>, Feng Tian<sup>†</sup>, John F. Doebley<sup>\*,2</sup>

7

8 <sup>\*</sup> Laboratory of Genetics, University of Wisconsin–Madison, WI 53706, USA

9 <sup>†</sup> National Maize Improvement Center, Key Laboratory of Biology and Genetic  
10 Improvement of Maize (MOA), Beijing Key Laboratory of Crop Genetic Improvement,  
11 Joint International Research Laboratory of Crop Molecular Breeding, China Agricultural  
12 University, Beijing 100193, China

13 <sup>‡</sup> School of Life Science, Shanxi Normal University, Linfen, Shanxi 041004, China

14 <sup>1</sup> Present address: College of Agronomy, Shenyang Agricultural University, Shenyang,  
15 Liaoning 110866, China

16 <sup>2</sup> Corresponding author: Laboratory of Genetics, University of Wisconsin–Madison, 425  
17 Henry Mall, WI 53706. E-mail: [jdoebley@wisc.edu](mailto:jdoebley@wisc.edu)

18 **Abstract**

19           Recombinant inbred lines (RILs) are an important resource for mapping genes  
20 controlling complex traits in many species. While RIL populations have been developed  
21 for maize, a maize RIL population with multiple teosinte inbred lines as parents has  
22 been lacking. Here, we report a teosinte nested association mapping population  
23 (TeoNAM), derived from crossing five teosinte inbreds to the maize inbred line W22.  
24 The resulting 1257 BC<sub>1</sub>S<sub>4</sub> RILs were genotyped with 51,544 SNPs, providing a high-  
25 density genetic map with a length of 1540 cM. On average, each RIL is 15%  
26 homozygous teosinte and 8% heterozygous. We performed joint linkage mapping (JLM)  
27 and genome-wide association study (GWAS) for 22 domestication and agronomic traits.  
28 A total of 255 QTLs from JLM were identified with many of these mapping to known  
29 genes or novel candidate genes. TeoNAM is a useful resource for QTL mapping for the  
30 discovery of novel allelic variation from teosinte. TeoNAM provides the first report that  
31 *PROSTRATE GROWTH1*, a rice domestication gene, is also a QTL associated with  
32 tillering in teosinte and maize. We detected multiple QTLs for flowering time and other  
33 traits for which the teosinte allele contributes to a more maize-like phenotype. Such QTL  
34 could be valuable in maize improvement.

35 Key words: *Zea mays*, RIL, TeoNAM, JLM, GWAS, maize, domestication

36

## 37 Introduction

38 Recombinant inbred line (RIL) populations are powerful tools for investigating the  
39 genetic architecture of traits and identifying the causal genes that underlie trait variation.  
40 RIL populations have been widely used in many organisms. In mammals, the well-  
41 known Collaborative Cross (CC), consisting of a large panel of multiparental  
42 recombinant inbred mouse lines, has been specifically designed for the analysis of  
43 complex traits (Churchill *et al.* 2004). Similarly, the *Drosophila* Synthetic Population  
44 Resource (DSPR), which consists of two sets of RILs, has been designed to combine  
45 the high mapping resolution offered by multiple generations of recombination with the  
46 high statistical power afforded by a linkage-based design (King *et al.* 2012). In plants,  
47 the maize nested association mapping population (NAM), which crossed 25 founders to  
48 a common parent in maize (Yu *et al.* 2008), has been successfully applied to a large  
49 number of traits (Buckler *et al.* 2009; Tian *et al.* 2011; Kump *et al.* 2011). The NAM  
50 design has also been utilized to other crops such as barley (Maurer *et al.* 2015; Nice *et al.*  
51 *et al.* 2016), rice (Fragoso *et al.* 2017), sorghum (Bouchet *et al.* 2017), wheat (Jordan *et al.*  
52 2018), and soybean (Xavier *et al.* 2018). In *Arabidopsis*, another design, called  
53 Multiparent Advanced Generation Inter-Cross (MAGIC) population, provides high  
54 precision to detect QTLs (Kover *et al.* 2009; Huang *et al.* 2011). This design has also  
55 been used in wheat (Huang *et al.* 2012; Mackay *et al.* 2014), rice (Bandillo *et al.* 2013),  
56 and maize (Dell'Acqua *et al.* 2015; Xiao *et al.* 2016).

57 For the study of maize domestication, many new discoveries were made using a  
58 biparental maize-teosinte BC<sub>2</sub>S<sub>3</sub> RIL population. Shannon (2012) performed QTL  
59 mapping for 16 traits and examined the genetic architecture of domestication at the  
60 whole genome level. This RIL population has also been widely used to fine-map QTL  
61 and identify causal or candidate genes for many QTLs including ones controlling seed  
62 shattering (Lin *et al.* 2012), leaf number (Li *et al.* 2016), kernel row number (Calderón *et al.*  
63 *et al.* 2016), shoot apical meristem morphology (Leiboff *et al.* 2016), vascular bundle  
64 number (Huang *et al.* 2016), tassel related traits (Xu *et al.* 2017b), and nodal root  
65 number (Zhang *et al.* 2018). With this population, several QTL have been fine-mapped  
66 to single genes including *grassy tillers 1 (gt1)* for controlling prolificacy (Wills *et al.* 2013),

67 *prolamin-box binding factor1 (pbf1)* for kernel weight (Lang *et al.* 2014), *glossy15 (gl15)*  
68 for vegetative phase changes (Xu *et al.* 2017a), *ZmCCT10* for photo-period response  
69 (Hung *et al.* 2012), and *zea agamous-like1 (zagl1)* for kernel row number and flowering  
70 time (Wills *et al.* 2017), as well as several more genes regulating flowering time:  
71 *ZmCCT9* (Huang *et al.* 2018), *Zea mays CENTRORADIALIS8 (ZCN8)* (Guo *et al.*  
72 2018), and *ZmMADS69* (Liang *et al.* 2018). In addition to phenotypic traits, the maize-  
73 teosinte BC<sub>2</sub>S<sub>3</sub> RIL population was used for a comprehensive genome-wide eQTL  
74 analysis to study the changes in gene expression during maize domestication (Wang *et*  
75 *al.* 2018).

76 Despite its utility, the maize-teosinte BC<sub>2</sub>S<sub>3</sub> RIL population has three limitations.  
77 First, there is only a single teosinte parent, which cannot broadly represent the diversity  
78 of teosinte. Second, this population had two generations of backcross, which produces  
79 a background in which some teosinte traits are suppressed and do not segregate  
80 among the RILs. Third, the teosinte parent was a wild outcrossed individual which,  
81 unlike an inbred line, could not be maintained as a permanent resource.

82 In this paper, we report the development of a teosinte NAM population (TeoNAM)  
83 of 1257 BC<sub>1</sub>S<sub>4</sub> RILs using five teosinte inbred parents crossed with a common maize  
84 parent (W22) for mapping QTLs for domestication and agronomic traits. We have  
85 genotyped the RILs with 51,544 genotype-by-sequencing (GBS) markers that provide a  
86 high-density genetic map. The TeoNAM population captures a large number of  
87 recombination events for localizing QTL to genomic locations and the single generation  
88 of backcross allows enhanced expression of teosinte traits as compared to the BC<sub>2</sub>S<sub>3</sub>  
89 RIL population. We report data for 22 traits but focus our discussion on 9 traits to  
90 illustrate the utility of TeoNAM including identifying candidate genes. TeoNAM will be a  
91 valuable resource for dissecting the genetic basis of domestication and agronomic traits.

92

## 93 Results

### 94 ***Characterization of a teosinte NAM population***

95 We developed a teosinte NAM population (TeoNAM), which was constructed by  
96 crossing five teosinte inbred lines to a maize inbred line W22, followed by one  
97 generation of backcross to the common recurrent maize parent and four generations of  
98 selfing (Figure S1). The teosinte parents include four *Zea mays* ssp. *parviglumis* lines  
99 and one *Zea mays* ssp. *mexicana* line. As such, TeoNAM encompasses five bi-parental  
100 families, each with 219-310 BC<sub>1</sub>S<sub>4</sub>-derived recombinant inbred lines (RILs) for a total of  
101 1257 RILs. The number of segregating SNP markers range from 11,395 to 16,109 per  
102 family with over 51,000 total SNP markers (Table 1).

103 The expected segregation for a BC<sub>1</sub>S<sub>4</sub> population is 73.44% homozygous  
104 recurrent, 3.13% heterozygous, and 23.44% homozygous donor parent. Overall, the  
105 percentage of genotypes observed were 76.6% W22 homozygous, 15% teosinte  
106 homozygous and 8.1% heterozygous across all SNP sites in the TeoNAM population  
107 (Table 1). The percentage of teosinte varied among subpopulations from 14.2%-16.2%  
108 (Table 1) and also varied across the genome in all subpopulations (Figure S2). The  
109 observed higher than expected heterozygosity may be due to unconscious selection for  
110 more heterozygous plants which had hybrid vigor. The chromosomal region of highest  
111 heterozygosity is on the short arm of chromosome 4 near *teosinte glume architecture1*  
112 (*tga1*) (Wang *et al.* 2005). Selection against homozygotes for the teosinte allele of *tga1*,  
113 which have poor ear and kernel quality, may be the cause. For a BC<sub>1</sub>S<sub>4</sub>, the expected  
114 frequency of the maize allele is 75%. All subpopulations deviate from this with an  
115 excess of maize allele (Table 1) and the amount of excess varies across the genome  
116 (Figure S3).

117 We constructed genetic linkage maps for each family and a composite linkage  
118 map based on all RILs across all families and identified and annotated 51,544 high  
119 confidence SNPs that were used to impute the SNP alleles in the RILs. The composite  
120 genetic map based on these markers is 1540 cM in length including 35,880 crossovers.  
121 We examined the relationship between genetic distance in cM and physical distance in

122 Mb based on the composite genetic map. The mean value is 0.75 cM/Mb. However,  
123 there is a wide deviation from the mean across the genome (0 - 5.52 cM/Mb). As  
124 expected, there is suppressed recombination near the centromeres (Figure S2) and  
125 frequent recombination near the telomeres where gene density is high as well (Figure  
126 S2).

127 We scored 22 traits for the TeoNAM lines of which 15 traits are domestication  
128 related, including vegetative gigantism (CULM, LFLN, and LFWD), prolificacy (PROL),  
129 tillering (TILN), ear shattering (SHN), conversion of the inflorescence from staminate to  
130 pistillate (STAM), multiple ear-related traits (EB, ED, EL, KRN, KW), glume traits (GLCO  
131 and GLUM), and red pericarp color (REPE) (Table 2). Additionally, several agronomic  
132 traits were scored including flowering (ASI, DTA, and DTS), plant architecture (PLHT  
133 and TBN), barren ear base (BARE), and yellow pericarp color (YEPE). Most traits (ASI,  
134 CULM, DTA, DTS, ED, EL, KRN, KW, LFLN, LFWD, PHLT, and TBN) follow  
135 approximately normal distribution, suggesting an oligo- or polygenic genetic control of  
136 these traits, but other traits (BARE, EB, GLCO, GLUM, PROL, REPE, SHN, STAM,  
137 TILN, and YEPE) exhibited a skewed or non-normal distribution. Some of these traits  
138 are meristic or discrete traits (e.g. PROL or TILN). A few traits, like STAM, show a two-  
139 part distribution with a spike at 0 plus continuous range of values from 0 to 2, which  
140 suggest they may be polygenic threshold traits (Figure S4). There are also substantial  
141 differences in trait mean among the five subpopulations, indicating underlying  
142 differences in genetic architecture among the five teosinte inbreds (Figure S5).

### 143 ***QTL mapping***

144 We used both Joint Linkage Mapping (JLM) and the Genome-Wide Association  
145 Study (GWAS) method as two complementary approaches for QTL detection. We also  
146 used basic interval QTL mapping for the five individual subpopulations to provide a  
147 guide for future work to fine-map the genes underlying the QTL. We detected 255 QTLs  
148 for 22 traits by JLM which combines information across all families (Figure 1; Table S1).  
149 We detected a total of 150 QTLs by GWAS, among which 57 QTLs overlapped with  
150 QTLs by JLM (Table S2). Separate QTL mapping for each subpopulation detected 464

151 QTLs in total, among which 310 QTLs overlapped with QTLs by JLM (Figure S6-S27;  
152 Table S3). Below, we focused on QTL detected by JLM for our characterization of the  
153 genetic architecture and the distribution of QTL allelic effects.

154 Among 22 traits, the number of QTL ranges from 2 to 24; the trait with most QTL  
155 is KRN. Genetic architecture varies considerably among traits (Figure 2; Figure S28).  
156 Several traits, including BARE, GLCO, GLUM, PROL, REPE, STAM and YEPE, had  
157 relatively simple genetic architectures with two to ten QTL including one of large effect.  
158 The largest QTL for each of these traits has between 2.1 and 11.7 times the additive  
159 effect of the second largest QTL. A second class of traits have a genetic architecture  
160 that is either more polygenic (ED, KRN, KW, LFLN, TBN, and TILN) or having only a  
161 few QTL of small effect (ASI, CULM, EB, LFWD, PLHT and SHN). For these traits, there  
162 was no single large effect QTL that accounts for the majority of the explainable  
163 variation. The largest effect QTL for each of these traits has between 1 and 1.8 times  
164 the size of the effect of the second largest QTL. A final class of traits has a genetic  
165 architecture with both a single QTL of large effect plus multiple QTLs of small effect.  
166 These traits include DTA, DTS, and EL. The largest effect QTL for each of these traits is  
167 between 2.4 and 3.7 times the size of the second largest QTL.

168 *QTL for agronomic traits:* DTA is a classical quantitative trait for maize, and in  
169 TeoNAM, it is controlled by a large-effect QTL plus many small-effect QTLs from JLM  
170 results. We detected 19 QTLs that explained 68% of the total variance for DTA (Figure  
171 3). Among them, several recently cloned flowering time genes were detected. For  
172 example, QTL *DTA1.1* mapped to *zea agamous like1 (zagl1)*, which affects flowering  
173 time as well as multiple traits related to ear size with the maize allele conferring larger  
174 ears with more kernels (Wills *et al.* 2017). The QTL *DTA3.1* mapped to *MADS-box*  
175 *transcription factor69 (ZmMADS69)*, which functions as a flowering activator through the  
176 *ZmRap2.7-ZCN8* regulatory module and contributes to both long-day and short-day  
177 adaptation (Liang *et al.* 2018). QTL *DTA8.1* mapped to *ZCN8*, which is the maize  
178 florigen gene and has a central role in mediating flowering (Meng *et al.* 2011; Guo *et al.*  
179 2018). QTL *DTA9.1* mapped to *ZmCCT9*, in which a distant Harbinger-like transposon  
180 acts as a *cis*-regulatory element to repress its expression to promote flowering under

181 the long days of higher latitudes (Huang *et al.* 2018). QTL *DTA10.1* mapped to  
182 *ZmCCT10*, a known gene involved in photoperiod response in maize (Hung *et al.* 2012;  
183 Yang *et al.* 2013).

184 In addition to these genes, we also identified several other candidate genes for  
185 DTA that have not previously been characterized as genes underlying a QTL. QTL  
186 *DTA3.2* mapped to *Zea mays CENTRORADIALIS12 (ZCN12)*, which is a potential floral  
187 activator (Meng *et al.* 2011). QTL *DTA4.1* mapped to *Zea mays MADS19 (zmm19)* and  
188 *DTA5.1* mapped to *Zea mays MADS31 (zmm31)*. QTL *DTA6.1* mapped to *silky1 (si1)*,  
189 which is also a MADS box gene required for lodicule and stamen identity (Ambrose *et*  
190 *al.* 2000). QTL *DTA6.2* mapped to *zea agamous1 (zag1)*, which is known to affect  
191 maize flower development (Schmidt *et al.* 1993). It's well known that MADS-box genes  
192 encode transcription factors that are key regulators of plant inflorescence and flower  
193 development (Theissen *et al.* 2000). Other than MADS genes, QTL *DTA7.2* mapped to  
194 *delayed flowering1 (dlf1)*, a floral activator gene downstream of *ZCN8* (Meng *et al.*  
195 2011).

196 As expected, the teosinte alleles delayed flowering for the QTL that mapped to  
197 candidate genes. We plotted the phenotypic difference in DTA between teosinte and  
198 maize across the whole genome, and the teosinte genotype is associated with late  
199 flowering over most of the genome, even where no QTL were detected, suggesting that  
200 there are many additional minor-effect QTLs that were not detected due to insufficient  
201 statistical power (Figure S29). Interestingly, chromosome 5 and 7 are exceptions to this  
202 pattern with teosinte genotype being associated with early flowering at most sites  
203 (Figure S29). Results for DTS are similar to DTA as expected (Figure S30).

204 TBN is the only tassel trait we scored. We detected 12 QTLs of small effects that  
205 explained 52% of the total variance for TBN (Figure S31). Among them, several  
206 classical genes were identified. QTL *TBN6.1* mapped to *fasciated ear4 (fea4)*, a bZIP  
207 transcription factor with fasciated ears and tassels as well as greatly enlarged  
208 vegetative and inflorescence meristems (Pautler *et al.* 2015). QTL *TBN6.2* mapped to  
209 *tasselsheath1 (tsh1)*, a GATA class transcription factor that promotes bract growth and  
210 reduces branching (Whipple *et al.* 2010). QTL *TBN7.1* mapped to *ramosa1 (ra1)*, a



211 C2H2 zinc-finger transcription factor which has tassels with an increased number of  
212 long branches as well as branched ears (Vollbrecht *et al.* 2005). QTL *TBN7.2* mapped  
213 to *tasselsheath4 (tsh4)*, a SBP-box transcription factor that functions to repress lateral  
214 organ growth and also affects phyllotaxy, axillary meristem initiation and meristem  
215 determinacy within the floral phase (Chuck *et al.* 2010). QTL *TBN8.1* mapped to *barren*  
216 *inflorescence1 (bif1)*, which shows a decreased production of branches and spikelet  
217 pairs (Barazesh and McSteen, 2008). QTL *TBN10.1* mapped to *zea floricaula leafy1*  
218 (*zfl1*), which together with its homolog *zfl2*, leads to a disruption of floral organ identity  
219 and patterning, as well as to defects in inflorescence architecture and in the vegetative  
220 to reproductive phase transition (Bomblies *et al.* 2003).

221 *QTL for domestication traits:* TILN is a classical domestication trait that  
222 measures difference in plant architecture between maize and its wild relative, teosinte –  
223 that is the low apical dominance of a highly branched teosinte plant as compared to the  
224 less-branched maize plant. We detected 18 small-effect QTLs that explained 68% of the  
225 total variance for TILN (Figure S32). Among them, QTL *TILN1.3* mapped to *tb1*, a TCP  
226 family of transcriptional regulators contributing to the increase in apical dominance  
227 during maize domestication (Doebley *et al.* 1997). Additionally, QTL *TILN3.2* mapped to  
228 *Zea AGAMOUS homolog2 (zag2)*, a MADS box gene recently found to be downstream  
229 of *tb1* (Studer *et al.* 2017). QTL *TILN1.1* and *TILN5.2* mapped to *zmm20* and *zmm26*,  
230 two other MADS box genes that were possible targets of selection during domestication  
231 (Zhao *et al.* 2011). QTL *TILN7.1* mapped to *PROSTRATE GROWTH1 (PROG1)*, a  
232 C2H2 zinc finger protein controlling a key change during rice domestication from  
233 prostrate to erect growth, and also affects plant architecture and yield-related traits (Jin  
234 *et al.*, 2008; Tan *et al.* 2008). There are 13 genes in the support interval and the QTL  
235 peak is closest to *PROG1*, being ~14 kb 5' of the start site (Figure S32). This is the first  
236 evidence that *PROG1* may have had a role in maize domestication.

237 GLUM is classical maize domestication trait measuring the dramatic change from  
238 the fruitcase-enveloped kernels of the teosinte ear to naked grains of maize ear.  
239 Previously, this trait was shown to be largely controlled by a single gene which is known  
240 as *teosinte glume architecture1 (tga1)* (Wang *et al.* 2005). Interestingly, *tga1* is a direct

241 target of *tb1*. We detected 11 QTLs that explained 62% of the total variance for GLUM.  
242 These QTL include a large effect QTL at *tga1* itself plus many small effect QTLs (Figure  
243 S33). Among the small effect QTL, our results show that two of them (*GLUM2.2* and  
244 *GLUM7.1*) mapped to MADS genes. In this regard, Studer *et al.* (2017) recently defined  
245 a maize domestication gene network in which *tga1* regulates multiple MADS-box  
246 transcription factors.

247 PROL is also an important domestication trait that measures difference in  
248 prolificacy or the many-eared plants of teosinte and the few-eared (one or two) plants of  
249 maize. Previously, a large effect QTL was fine-mapped to a region 2.7 kb upstream of  
250 *grassy tillers1* (*gt1*) (Wills *et al.* 2013). Interestingly, *gt1* is a known target of *tb1*  
251 (Whipple *et al.* 2011). We detected four QTLs that explained 39% of the total variance  
252 for PROL, which include a single large effect QTL plus three small effect QTLs (Figure  
253 S34). Concordantly, QTL *PROL1.1* mapped to *gt1*. QTL *PROL2.1* mapped to  
254 *zea floricaula leafy2* (*zfl2*), which was shown to have a pleiotropic effect on lateral  
255 branch number (Bomblies and Doebley, 2006). QTL *PROL3.1* mapped to *sparse*  
256 *inflorescence1* (*spi1*), a mutant that has defects in the initiation of axillary meristems  
257 and lateral organs during vegetative and inflorescence development in maize (Gallavotti  
258 *et al.* 2008). QTL *PROL5.1* mapped to *yabby9* (*yab9*), a class of transcription factor that  
259 might play important roles during maize domestication.

260 STAM measures the proportion of the terminal lateral inflorescence on the  
261 uppermost lateral branch that is staminate. Relative to domestication, this trait  
262 represents the sexual conversion of the terminal lateral inflorescence from tassel  
263 (staminate) in teosinte to ear (pistillate) in maize. Currently, *teosinte branched1* (*tb1*)  
264 and *tassel replace upper ears1* (*tru1*) are the only two genes that have been shown to  
265 regulate this sexual difference. We detected five QTLs that explained 27% of the total  
266 variance for STAM (Figure 4). QTL *STAM1.2* mapped to *tb1*, which is an important  
267 domestication gene known for various traits (Doebley *et al.* 1995). QTL *STAM3.1*  
268 mapped to *tru1* which is a direct target of *tb1* (Dong *et al.* 2017). QTL *STAM1.1* mapped  
269 to *tassel seed2* (*ts2*), a recessive mutant that produces pistillate spikelets in the terminal  
270 inflorescence (tassel) (Irish and Nelson, 1993). QTL *STAM3.2* mapped to *Zea mays*

271 *MADS16* (*zmm16*), which shows high expression in tassel and silk. QTL *STAM7.1*  
272 mapped to *tassel sheath4* (*tsh4*), a SQUAMOSA PROMOTER BINDING (SBP)-box  
273 transcription factor that regulates the differentiation of lateral primordia (Chuck *et al.*  
274 2010). In addition to these QTLs, two other STAM QTLs were detected by GWAS.  
275 Notably, a QTL on chromosome 1 (AGPv4 chr1:234.4-249.9Mb) is located upstream of  
276 *tb1* and co-localized with *STAM1.1* from a recent study (Yang *et al.* 2018). The known  
277 gene *anther ear1* (*an1*) is a strong candidate gene for this QTL since loss of *an1*  
278 function results in the development of staminate flowers in the ears (Bensen *et al.*  
279 1995). The *tb1* QTL region was also detected by GWAS with a strong signal for interval  
280 AGPv4 chr1:264.1-283.1Mb.

281 SHN measures ear shattering, the loss of which is a key step during crop  
282 domestication (Doebley, 2006). Teosinte ears have abscission layers between the  
283 fruitcases (modified internodes) that allow the ear to shatter into single-seed units  
284 (fruitcase) at maturity. The maize ear lacks abscission layers and remains intact at  
285 maturity. Currently, only two maize orthologs (*ZmSh1-1* and *ZmSh1-5.1+ZmSh1-5.2*) of  
286 sorghum and rice *Shattering1* (*Sh1*) were verified for seed shattering (Lin *et al.* 2012).  
287 We detected six QTLs that explained 30% of the total variance for SHN (Figure S35).  
288 QTL *SHN1.1* and *SHN5.1* mapped to *Sh1.1* and *Sh1-5.1/5.2*, respectively, confirming  
289 prior identification of these maize paralogs of the sorghum shattering gene as strong  
290 candidates for our QTL.

291 KRN is a domestication trait measuring the dramatic change from the two-ranked  
292 teosinte ear to multiple (4 or more) ranked maize ear. We detected 24 small-effect QTLs  
293 that explained 62% of the total variance for KRN (Figure S36). Among them, QTL  
294 *KRN1.3* mapped to *indeterminate spikelet1* (*ids1*), an APETALA2-like transcription  
295 factor that specifies determinate fates by suppressing indeterminate growth within the  
296 spikelet meristem (Chuck *et al.* 1998). A previous fine-mapping study of KRN using a  
297 maize-teosinte BC<sub>2</sub>S<sub>3</sub> RIL population also identified *ids1* is a strong candidate for KRN  
298 (Calderón *et al.* 2016). QTL *KRN4.2* mapped to *unbranched3* (*ub3*), a SBP transcription  
299 factor that has been shown to regulate kernel row number in both mutant and QTL  
300 studies (Chuck *et al.* 2014; Liu *et al.* 2015).

301 REPE for reddish-brownish pericarp is a trait that distinguishes teosinte kernels  
302 from those of most maize. The role of pigmentation in domestication is complex in that  
303 pigment can provide defense against molding and bird predation but can also impart  
304 bitterness and astringency (Morohashi *et al.* 2012). The red (or reddish brown)  
305 pigmentation often results from the accumulation of phlobaphenes - a flavonoid pigment  
306 (Morohashi *et al.* 2012). In the absence of the reddish-brown pigment, the kernels are  
307 white kernels unless anthocyanins (blue-purple) or carotenoids (yellow-orange) are  
308 present. Our results show that QTL *REPE1.1* mapped to *Pericarp color1 (P1)* (Figure  
309 S37), which encodes an R2R3 Myb-like transcription factor that governs the  
310 biosynthesis of brick-red flavonoid pigments (Grotewold *et al.* 1994).

311 Results for 13 additional traits (ASI, BARE, CULM, DTS, EB, ED, EL, GLCO,  
312 KW, LFLN, LFWD, PLHT, and YEPE) are reported in supplemental figures and tables  
313 (Figure S30, S38-S49; Table S1).

#### 314 ***QTL detection and effects***

315 To evaluate the power of QTL mapping using TeoNAM, we summarized the  
316 distribution of QTLs detected with significant effects in the different subpopulations.  
317 Among 255 QTLs for 22 traits, 246 QTLs (96%) were detected in two or more  
318 subpopulations, 186 QTLs (73%) were detected in three or more subpopulations, 83  
319 QTLs (33%) were detected in four or more subpopulations and 29 QTLs (11%) were  
320 detected in all five subpopulations (Figure 5A). These percentages are conservative as  
321 not all traits were scored in all five subpopulations. If one considers whether the QTL  
322 was detected in subpopulations in which it was scored, then 205 QTLs (80%) were  
323 detected in at least half of the subpopulations and 39 QTLs (15%) were detected in all  
324 subpopulations.

325 The allelic effect from different teosinte parents were estimated simultaneously  
326 by JLM. For most QTLs, the allelic effects from different subpopulations are in the same  
327 direction (Figure 5B). For seven traits (EB, GLUM, LFWD, PROL, SHN, STAM, and  
328 YEPE), the teosinte genotypes were consistently associated with a teosinte phenotype  
329 and the W22 allele with a maize phenotype at all QTLs. For all other traits, cases in

330 which a teosinte allele was associated with the maize phenotype were detected. For  
331 example, the teosinte genotype is associated with late flowering at most QTLs for DTA  
332 except *DTA5.2* and *DTA7.1*, for which the teosinte genotype consistently contributes to  
333 early flowering in at least three subpopulations (Figure 2). Similar results were observed  
334 for KRN and EL. The teosinte genotype is associated with fewer kernel row number  
335 (KRN) at most QTLs, but there is one QTL (*KRN5.1*) for which the teosinte genotype is  
336 consistently associated with more kernel row number in four subpopulations and also in  
337 the BC<sub>2</sub>S<sub>3</sub> population (Figure S36). The teosinte genotype is associated with shorter ear  
338 length (EL) at most QTLs, but there are two QTLs (*EL4.1* and *EL9.1*) for which the  
339 teosinte genotype is consistently associated with longer ear length in four and two  
340 subpopulations, respectively (Figure S43). These QTLs might be worth exploring further  
341 for use in maize improvement.

342 We also observed some interesting results for different teosinte parents. For KW,  
343 the teosinte genotype from different subpopulations is associated with reduced kernel  
344 weight at most QTLs. Only three QTLs (*KW5.3*, *KW6.2* and *KW9.1*) are exceptions with  
345 one teosinte allele conferring heavier kernels. Interestingly for these three QTLs, the  
346 teosinte alleles with effects in the opposite direction are all from the TIL14  
347 subpopulation (Figure S45). Similar results were observed for ED, where the teosinte  
348 genotype is associated with a decrease in ear diameter at most QTLs, but the teosinte  
349 allele from TIL03 at two QTLs (*ED2.1* and *ED6.1*) is associated with the increase of ear  
350 diameter (Figure S42). These results suggest that there are beneficial alleles from  
351 teosinte that could be utilized for maize improvement.

### 352 ***Comparing and combining TeoNAM with the BC<sub>2</sub>S<sub>3</sub>***

353 We compared TeoNAM with the previous maize-teosinte BC<sub>2</sub>S<sub>3</sub> RIL population.  
354 The composite genetic map for TeoNAM is 1540 cM in length. The individual genetic  
355 maps based on the five subpopulations have an average length of 1461 cM with a  
356 range of 1348-1506 cM. The genetic map for BC<sub>2</sub>S<sub>3</sub> RIL population is 1478 cM in  
357 length. Thus, the TeoNAM subpopulations are similar to the BC<sub>2</sub>S<sub>3</sub> RIL population in  
358 genetic map length. The median length of homozygous teosinte segment in TeoNAM is  
359 6 Mb. The median length of homozygous teosinte segment in BC<sub>2</sub>S<sub>3</sub> population is 4.8

360 Mb. The longer segment length for TeoNAM is expected given it had one fewer  
361 generations of backcrossing and less opportunity for recombination. The mean number  
362 of homozygous teosinte segment in TeoNAM is 3502, and the number of homozygous  
363 teosinte segment in BC<sub>2</sub>S<sub>3</sub> is 5745. The total length of teosinte segments for the five  
364 subpopulations is 67 GB (W22×TIL01), 87 GB (W22×TIL03), 66 GB (W22×TIL11), 56  
365 GB (W22×TIL14) and 79 GB (W22×TIL25), and the BC<sub>2</sub>S<sub>3</sub> (W22×8759) exceeds this  
366 range with 110 GB.

367 Previously, Shannon (2012) performed a comprehensive interval QTL analysis  
368 for 16 agronomic traits in the BC<sub>2</sub>S<sub>3</sub> population and identified 218 QTLs for 16 traits.  
369 Among these traits, 14 traits were also scored in TeoNAM population. For the common  
370 14 traits, 168 and 179 QTLs were detected for TeoNAM and BC<sub>2</sub>S<sub>3</sub> population,  
371 respectively. The mean QTL support interval across 14 traits for BC<sub>2</sub>S<sub>3</sub> is 5.7Mb, which  
372 is significantly smaller than TeoNAM of 17.2Mb ( $P=2.6E-08$ ) (Figure S50). Among these  
373 QTLs, 50 QTLs overlapped between the two populations. For the common QTLs, the  
374 mean variance explained by QTL is 3.4% and 2.9% for BC<sub>2</sub>S<sub>3</sub> and TeoNAM,  
375 respectively. Thus, there is no significant difference in QTL effect size ( $P=0.3$ ) (Figure  
376 S51).

377 To maximize the power to detect QTLs, we combined TeoNAM and BC<sub>2</sub>S<sub>3</sub> for  
378 eight traits (DTA, ED, EL, KRN, KW, GLCO, GLUM, and TILN) that were measured in  
379 all six subpopulations by the exactly same method to perform JLM. Before analysis, we  
380 imputed the genotype for BC<sub>2</sub>S<sub>3</sub> at 4578 TeoNAM SNPs according to the flanking  
381 markers using the same procedure as for TeoNAM and permuted a new p-value cutoff  
382 for statistical significance for each trait. The LSMs from previous analysis (Shannon  
383 2012) were used for JLM. With the combined TeoNAM-BC<sub>2</sub>S<sub>3</sub> data, we detected 184  
384 QTLs for these eight traits, which include 109 QTLs overlapped with TeoNAM, 80 QTLs  
385 overlapped with the BC<sub>2</sub>S<sub>3</sub> and 32 novel QTLs not detected in either TeoNAM or the  
386 BC<sub>2</sub>S<sub>3</sub> (Table S4). The QTLs with significant allele effects in multiple subpopulations will  
387 be good targets for fine-mapping. For future analysis of additional traits, one could  
388 combine TeoNAM and the BC<sub>2</sub>S<sub>3</sub> together. The value of this combination is that there is  
389 one additional teosinte allele and increased QTL detection power, but the downside is

390 that one would need to assay the BC<sub>2</sub>S<sub>3</sub> population with 866 RILs plus TeoNAM with  
391 1257 RILs.

## 392 Discussion

393 RILs are powerful tools for dissecting complex genetic architecture of different  
394 traits and for gene discovery. RILs such as maize NAM population have been  
395 successfully used for genetic dissection of many traits (Buckler *et al.* 2009; Tian *et al.*  
396 2011; Kump *et al.* 2011). RILs with the multiple parents greatly increase the power and  
397 precision to identify QTLs compared to the traditional bi-parent RIL population. Multi-  
398 parent RILs also enable the estimation of allele effects simultaneously from each inbred  
399 parent. Our TeoNAM RILs were created by crossing five teosinte inbred parents with a  
400 maize inbred parent, but differs from MaizeNAM in that we applied a generation of  
401 backcrossing to the maize parent before four generations of selfing. The power and  
402 precision of TeoNAM can be shown with several traits. For example, we detected 19  
403 QTLs for DTA, among which many QTLs mapped to recently cloned genes such as  
404 *ZmCCT10*, *ZmCCT9*, *ZCN8*, *zag1* and *ZmMADS69*. QTLs also mapped to some novel  
405 candidates such as *dlf1*, *si1*, *zag1*, *ZCN12*, *zmm19* and *zmm31*, which may have an  
406 important role in flowering time regulation.

407 For RIL populations, both JLM and GWAS are common methods for QTL  
408 detection. In this study, we identified 255 QTLs for 22 traits by JLM, and significant  
409 peaks were detected at 57 QTLs by GWAS, which suggests that GWAS is less powerful  
410 than JLM for mapping QTLs in TeoNAM. Nevertheless, there are a few instances in  
411 which GWAS gave evidence of closely linked QTL that were not separated by JLM. For  
412 example, we did not identify *an1*, a strong candidate for STAM QTL on chromosome 1  
413 with JLM possibly because it's closely linked to *tb1* (candidate of QTL *STAM1.1*), but we  
414 detected significant peaks at both *an1* and *tb1* through GWAS as it tests each SNP  
415 independently.

416 TeoNAM has allowed us to infer distinct genetic architectures for different traits.  
417 Traits like PROL and GLUM are controlled by a major effect QTL plus several QTLs of  
418 very small effect, while traits like DTA and KRN show more classic polygenic

419 inheritance. These contrasting genetic architectures suggest that evolution during  
420 domestication did not always follow the same path. A variant of large effect at one locus  
421 with a few other small effect genes allowed naked kernels to evolve from covered  
422 kernels, but the more quantitative increase in the number of kernel rows required a  
423 larger number of genes with no single gene of substantially greater effect than all  
424 others.

425 In our study, a total of 15 domestication traits and 7 agronomic traits were  
426 analyzed. Further fine-mapping and gene cloning will be required to find the causal  
427 genes underlying QTLs for these traits. TeoNAM should also be useful for investigating  
428 genetic control of many new traits that we did not assay. Morphological traits such as  
429 root architecture, shoot apical meristem size, vasculature, and kernel shape can be  
430 explored. Also, molecular traits such as gene expression (eQTL), alternative splicing,  
431 grain protein content, and metabolites can also be explored to better understand the full  
432 spectrum of changes that occurred during maize domestication.

433

## 434 **Materials and Methods**

### 435 ***Population development***

436 The teosinte NAM population was designed as a genetic resource for studying  
437 maize genetics and domestication. Five wild teosinte parents were chosen with four  
438 teosinte inbred lines that capture some diversity of *Zea mays* ssp. *parviglumis* (TIL01,  
439 TIL03, TIL11 and TIL14) and one teosinte inbred line of *Zea mays* ssp. *mexicana*  
440 (TIL25). The common parent is a modern maize inbred line W22 that has been widely  
441 used in maize genetics. The five teosinte parents were crossed to W22, and followed by  
442 one generation of backcross and four generations of selfing (Figure S1). We obtained  
443 1257 BC<sub>1</sub>S<sub>4</sub> recombinant inbred lines (RILs) with 223, 270, 219, 235 and 310 lines for  
444 W22×TIL01, W22×TIL03, W22×TIL11, W22×TIL14 and W22×TIL25, respectively.

### 445 ***Marker Data***



446 All DNA samples of 1257 lines were genotyped using Genotype-by-Sequencing  
447 (GBS) technology (Elshire *et al.* 2011). The genotypes were called from GBS raw  
448 sequencing reads using the TASSEL5-GBS Production Pipeline based on 955,690  
449 SNPs in the ZeaGBSv2.7 Production TagsOnPhysicalMap file (Glaubitz *et al.* 2014).  
450 Then, the raw GBS markers were filtered in each RIL subpopulation using following  
451 steps. We first removed sites with minor allele frequencies below 5% and thinned sites  
452 with 64 bp apart using "Thin Sites by Position" in TASSEL5 (Bradbury *et al.* 2007), and  
453 then we ran FSFHap Imputation in TASSEL5 separately for each chromosome using  
454 the following parameters: backcross (bc), Phet=0.03125, Fillgaps=TRUE, and the  
455 default settings for other features. The imputed parental call files from the 10  
456 chromosomes were then combined together and passed to R/qtl (Broman *et al.* 2003) to  
457 estimate genetic map. The B73 reference genome v2 was used to determine marker  
458 order, and genetic distances between markers was calculated using the Haldane  
459 mapping function as part of the *est.map* command with an assumed genotyping error  
460 rate of 0.001 taking the BC<sub>1</sub>S<sub>4</sub> pedigree of the RIL into consideration (Shannon 2012).  
461 Bad genetic markers were identified by visual inspection of the genetic map and  
462 removed, then we repeated all filtering steps. Finally, an average of 13,733 high-quality  
463 SNPs was obtained for each subpopulation (Table 1).

#### 464 ***Field design and phenotyping***

465 The teosinte NAM population was planted using a randomized complete block  
466 design at the University of Wisconsin West Madison Agricultural Research Station (UW-  
467 WMARS) in different years. The subpopulations W22×TIL01, W22×TIL03, W22×TIL11  
468 were grown in summer 2015 and 2016, the subpopulation W22×TIL14 was grown in  
469 summer 2016 and 2017, and the subpopulation W22×TIL25 was grown in summer 2017  
470 with two blocks. We planted one subpopulation within each block, and all lines were  
471 randomized within each block. Each row had 16 seeds planted with 1-foot apart, and  
472 spacing between any two rows was 30-inch.

473 Twenty-two traits were scored (Table 2): days to anthesis (DTA) (number of days  
474 between planting and when at least half the plants in a plot were shedding pollen); days  
475 to silk (DTA) (number of days between planting and when at least half the plants in a

476 plot were showing silk); anthesis-silk interval (ASI) (number of days between anthesis  
477 and silk); tassel branch number (TBN) (number of tassel branches on the main stalk);  
478 culm diameter (CULM) (diameter of the narrowest plane of main stalk right above the  
479 ground); plant height (PLHT) (distance from ground to the topmost node on the main  
480 stalk); leaf length (LFLN) (length of a well-developed leaf, usually 4th-6th from top); leaf  
481 width (LFWD) (width of a well-developed leaf, usually 4th-6th from top); tiller number  
482 (TILN) (number of tillers surrounding main stalk); prolificacy (PROL) (0 vs. 1 for  
483 absence/presence of secondary ears at the topmost branch-bearing node on the main  
484 stalk); ear branch number (EB) (number of branch on the primary lateral inflorescence);  
485 staminate spikelet (STAM) (0-3 scale for spikelet sex on the primary lateral  
486 inflorescence, where 0 indicates completely feminized, and 3 indicates completely  
487 staminate); kernel row number (KRN) (number of internode columns on the primary  
488 lateral inflorescence); ear length (EL) (length of the primary lateral inflorescence); ear  
489 diameter (ED) (diameter of the primary lateral inflorescence); kernel weight (KW)  
490 (average weight of 50 random kernels from 5 ears); shattering (SHN) (number of pieces  
491 into which an ear shattered when dropped to the floor from a height of ~1.8m); barren  
492 ear base (BARE) (0-2 scale for lack of kernels at the base of ear, where 0 indicates  
493 kernels present at the base, and 2 indicates no developed kernels at the base of the  
494 ear); glume score (GLUM) (0-3 scale for glume size, where 0 indicates small and 3  
495 indicates large); glume color (GLCO) (0-4 scale glume color for white through brown);  
496 red pericarp (REPE) (0-2 scale for colorless to red pericarp); yellow pericarp (YEPE) (0-  
497 2 scale for dull yellow to bright yellow pericarp). The average trait value from two years  
498 were used for QTL analysis.

### 499 ***Genetic map construction and marker imputation***

500 A composite genetic map was constructed for the TeoNAM population. The  
501 markers from the five RIL subpopulations were combined together into 51,544 unique  
502 SNPs, and the missing genotypes were imputed according to the flanking markers. If  
503 the flanking markers have same genotypes, the missing genotype was imputed as the  
504 same with flanking markers, otherwise left as missing. The imputed genotypes were  
505 then passed to R/qtl software to estimate the genetic map.

506           Since stepwise regression cannot use individuals with missing marker data, we  
507 performed a further step to impute missing data around break point as previously  
508 described (Tian *et al.* 2011). First, we transformed genotype to numeric format, in which  
509 markers with homozygous W22 parent were coded as 0, markers with homozygous  
510 non-W22 parent were coded as 2, and markers with heterozygous genotypes were  
511 coded as 1. Markers within breakpoint were imputed according to the genetic distance  
512 of flanking two markers. Considering stepwise regression is computationally intensive,  
513 we thinned SNPs within 0.1 cM. We finally obtained 4,578 markers for subsequent joint  
514 linkage analysis.

### 515 ***Simple QTL mapping***

516           QTL mapping was carried out using a modified version of R/qtl (Broman *et al.*,  
517 2003) which takes into account the BC<sub>1</sub>S<sub>4</sub> pedigree of the RILs (Shannon, 2012). For  
518 each trait, a total of 1000 permutation tests were used to determine the significance  
519 threshold level for claiming QTLs. After permutation, an approximate LOD score of 4.0  
520 at  $P < 0.05$  was obtained across all traits. With the LOD threshold, simple interval  
521 mapping was first fitted using Haley-Knott regression implemented in the *scanone*  
522 command of R/qtl. The multiple QTL model was then applied to search for additional  
523 QTL and accurately refine QTL positions using *refineqtl* and *addqtl* in R/qtl. The entire  
524 process was repeated until significant QTLs could no longer be added. The total  
525 phenotypic variation explained by all QTLs was calculated from a full model that fitted all  
526 QTL terms in the model using the *fitqtl* function. The percentage of phenotypic variation  
527 explained by each QTL was estimated using a drop-one-ANOVA analysis implemented  
528 with the *fitqtl* function. The confidence interval for each QTL was defined using a 1.5-  
529 LOD support interval. To make results comparable among five subpopulations, the  
530 composite genetic map was used for QTL mapping.

### 531 ***Joint linkage mapping***

532           To map QTL in the TeoNAM population, a joint linkage mapping (JLM) procedure  
533 was performed as previously described (Buckler *et al.* 2009; Tian *et al.* 2011). First, a  
534 total of 1000 permutation were performed to determine the significance cutoff for each

535 trait. JLM was performed using the stepwise linear regression fixed model implemented  
536 by PROC GLMSELECT procedure in SAS software. The family main effect was fit first,  
537 and then marker effects nested within families were selected to enter or leave the model  
538 based on the permuted P-value using a marginal F-test. After the model was fit with  
539 stepwise regression, each marker was dropped from the full model one at a time and a  
540 single best marker was refit to improve the overall fit of the model using the remaining  
541 QTL as background. A threshold of  $\alpha=0.05$  was used to declare significant allele effects  
542 across families within each QTL identified by stepwise regression. The QTL support  
543 interval was calculated by adding each marker from the same chromosome of that QTL  
544 at a time to the full model. If the p-value of the marginal F-test of the QTL was not  
545 significant at the 0.01 level, the flanking marker should be in the support interval for the  
546 QTL as the new flanking marker explained the QTL as well as the original marker.

#### 547 **GWAS**

548 A genome-wide association study (GWAS) approach was also used to map QTL  
549 in the TeoNAM population. Since GBS produces relatively low-density markers, the  
550 955,690 raw SNPs from GBS pipeline were filtered using a less conservative criteria:  
551  $MAF > 0.01$ , missing rate  $< 0.75$ , and heterozygosity rate  $< 0.1$ . After this filtering,  
552 181,404 GBS SNPs were used to run FSFHap Imputation in TASSEL5 separately for  
553 each chromosome and subpopulation using the following parameters: backcross (bc),  
554 Phet=0.03125, Fillgaps=TRUE, and the default settings for other features. Imputed  
555 genotypes were then combined together and SNPs with missing rate more than 0.2 and  
556  $MAF$  less than 0.05 across 1257 RILs were removed and a total of 118,838 SNPs were  
557 kept and used for GWAS. GWAS was performed using a linear mixed model accounting  
558 for population structure (Q) and kinship matrix (K), where Q was computed as the first  
559 five principle components and K was calculated using centered IBS method as  
560 implemented in TASSEL (Bradbury *et al.* 2007). The P value below  $P=0.00001$  (LOD=5)  
561 was considered as significance threshold following a previous study (Kremling *et al.*  
562 2018).

563 **QTL candidate analysis**

564 To report the QTL position following the latest genomic version, we used the  
565 CrossMap (Zhao *et al.* 2014) software to uplift the GBS SNP positions from maize B73  
566 reference AGPv2 coordinates to AGPv4 coordinates. QTL candidates were analyzed by  
567 checking the gene annotations of genes within QTL support intervals.

568 **Data Availability**

569 Seeds for all 1257 RILs are available through the Maize Genetics Cooperative  
570 Stock Center and the SNP genotypes of TeoNAM are available at the Cyverse  
571 Discovery Environment under the directory:  
572 /iplant/home/shared/panzea/genotypes/GBS/TeosinteNAM/. The genotypes were  
573 uploaded with AGPv2 position in the marker name.

574

575 **Acknowledgements**

576 This research was supported by the US National Science Foundation (NSF)  
577 grants IOS 1238014 and China Postdoctoral Science Foundation (2018M640204). No  
578 conflict of interest declared. We thank Karl Broman for suggestions on the analyses,  
579 and Jesse Rucker, Elizabeth Buschert, Eric Rentmeester, Adam Mittermaier, David  
580 Sierakowski, and Brian Schaeffer for assistance with field work and phenotyping.

581

582 **Literature Cited**

583 Ambrose, B. A., Lerner, D. R., Ciceri, P., Padilla, C. M., Yanofsky, M. F., and Schmidt,  
584 R. J. (2000). Molecular and genetic analyses of the *silky1* gene reveal conservation  
585 in floral organ specification between eudicots and monocots. *Mol. Cell* 5:569–579.

586 Bandillo, N., Raghavan, C., Muyco, P. A., Sevilla, M. A. L., Lobina, I. T., Dilla-Ermita, C.  
587 J., Tung, C. W., McCouch, S., Thomson, M., Mauleon, R., et al. (2013). Multi-  
588 parent advanced generation inter-cross (MAGIC) populations in rice: Progress and  
589 potential for genetics research and breeding. *Rice* 6:1–15.

590 Barazesh, S., and McSteen, P. (2008). *Barren inflorescence1* functions in  
591 organogenesis during vegetative and inflorescence development in maize.

- 592 Genetics 179:389–401.
- 593 Bensen, R.J., Johal, G.S., Crane, V.C., Tossberg, J.T., Schnable, P.S., Meeley, R.B.  
594 and Briggs, S.P. (1995). Cloning and characterization of the maize *An1* gene. *Plant*  
595 *Cell* 7:75–84.
- 596 Bomblies, K., Wang, R.L., Ambrose, B.A., Schmidt, R.J., Meeley, R.B. and Doebley, J.  
597 (2003). Duplicate *FLORICAULA/LEAFY* homologs *zfl1* and *zfl2* control  
598 inflorescence architecture and flower patterning in maize. *Development* 130:2385–  
599 2395.
- 600 Bomblies, K., and Doebley, J. F. (2006). Pleiotropic effects of the duplicate maize  
601 *FLORICAULA/LEAFY* genes *zfl1* and *zfl2* on traits under selection during maize  
602 domestication. *Genetics* 172:519–531.
- 603 Bouchet, S., Olatoye, M. O., Marla, S. R., Perumal, R., and Tesso, T. (2017). Increased  
604 power to dissect adaptive traits in global sorghum diversity using a nested  
605 association mapping population. *Genetics* 206:573–585.
- 606 Bradbury, P. J., Zhang, Z., Kroon, D. E., Casstevens, T. M., Ramdoss, Y., and Buckler,  
607 E. S. (2007). TASSEL: software for association mapping of complex traits in  
608 diverse samples. *Bioinformatics* 23:2633–2635.
- 609 Broman, K. W., Wu, H., Sen, S., and Churchill, G. A. (2003). R/qtl: QTL mapping in  
610 experimental crosses. *Bioinformatics* 19:889–890.
- 611 Buckler, E.S., Holland, J.B., Bradbury, P.J., Acharya, C.B., Brown, P.J., Browne, C.,  
612 Ersoz, E., Flint-Garcia, S., Garcia, A., Glaubitz, J.C., et al. (2009). The genetic  
613 architecture of maize flowering time. *Science* 325:714–718.
- 614 Calderón, C. I., Yandell, B. S., and Doebley, J. F. (2016). Fine mapping of a QTL  
615 associated with kernel row number on chromosome 1 of maize. *PLoS One*  
616 11:e0150276.
- 617 Chuck, G., Meeley, R. B., and Hake, S. (1998). The control of maize spikelet meristem  
618 fate by the *APETALA2*-like gene *indeterminate spikelet1*. *Genes Dev.* 12:1145–  
619 1154.
- 620 Chuck, G., Whipple, C., Jackson, D., and Hake, S. (2010). The maize SBP-box  
621 transcription factor encoded by *tasselsheath4* regulates bract development and the  
622 establishment of meristem boundaries. *Development* 137:1243–1250.
- 623 Chuck, G. S., Brown, P. J., Meeley, R., and Hake, S. (2014). Maize *SBP-box*  
624 transcription factors *unbranched2* and *unbranched3* affect yield traits by regulating  
625 the rate of lateral primordia initiation. *Proc. Natl. Acad. Sci. USA* 111:18775–18780.
- 626 Churchill, G.A., Airey, D.C., Allayee, H., Angel, J.M., Attie, A.D., Beatty, J., Beavis,  
627 W.D., Belknap, J.K., Bennett, B., Berrettini, W., et al. (2004). The Collaborative  
628 cross, a community resource for the genetic analysis of complex traits. *Nat. Genet.*  
629 36:1133–1137.
- 630 Dell'Acqua, M., Gatti, D. M., Pea, G., Cattonaro, F., Coppens, F., Magris, G., Hlaing, A.

- 631 L., Aung, H. H., Nelissen, H., Baute, J., et al. (2015). Genetic properties of the  
632 MAGIC maize population: a new platform for high definition QTL mapping in Zea  
633 mays. *Genome Biol.* 16:1–23.
- 634 Doebley, J. F., Gaut, B. S., and Smith, B. D. (2006). The molecular genetics of crop  
635 domestication. *Cell* 127:1309–1321.
- 636 Doebley, J., Stec, A. and Gustus, C. (1995). *teosinte branched1* and the origin of maize:  
637 evidence for epistasis and the evolution of dominance. *Genetics* 141:333–346.
- 638 Doebley, J., Stec, A. and Hubbard, L. (1997). The evolution of apical dominance in  
639 maize. *Nature* 386:485–488.
- 640 Dong, Z., Li, W., Unger-Wallace, E., Yang, J., Vollbrecht, E. and Chuck, G. (2017). Ideal  
641 crop plant architecture is mediated by *tassels replace upper ears1*, a BTB/POZ  
642 ankyrin repeat gene directly targeted by TEOSINTE BRANCHED1. *Proc. Natl.*  
643 *Acad. Sci. USA* 114:E8656–E8664.
- 644 Elshire, R. J., Glaubitz, J. C., Sun, Q., Poland, J. A., Kawamoto, K., Buckler, E. S., and  
645 Mitchell, S. E. (2011). A robust, simple genotyping-by-sequencing (GBS) approach  
646 for high diversity species. *PLoS One* 6:e19379.
- 647 Evans, M. M. S., and Kermicle, J. L. (2001). *Teosinte crossing barrier1*, a locus  
648 governing hybridization of teosinte with maize. *Theor. Appl. Genet.* 103:259–265.
- 649 Fragoso, C. A., Moreno, M., Wang, Z., Heffelfinger, C., Arbelaez, L. J., Aguirre, J. A.,  
650 Franco, N., Romero, L. E., Labadie, K., Zhao, H., et al. (2017). Genetic architecture  
651 of a rice nested association mapping population. *G3 (Bethesda)* 7:1913–1926.
- 652 Gallavotti, A., Barazesh, S., Malcomber, S., Hall, D., Jackson, D., Schmidt, R. J., and  
653 McSteen, P. (2008). *sparse inflorescence1* encodes a monocot-specific *YUCCA*-  
654 like gene required for vegetative and reproductive development in maize. *Proc.*  
655 *Natl. Acad. Sci. USA* 105:15196–15201.
- 656 Glaubitz, J. C., Casstevens, T. M., Lu, F., Harriman, J., Elshire, R. J., Sun, Q., and  
657 Buckler, E. S. (2014). TASSEL-GBS: A high capacity genotyping by sequencing  
658 analysis pipeline. *PLoS One* 9:e90346.
- 659 Grotewold, E., Drummond, B.J., Bowen, B. and Peterson, T. (1994). The *myb*-  
660 homologous *P* gene controls phlobaphene pigmentation in maize floral organs by  
661 directly activating a flavonoid biosynthetic gene subset. *Cell* 76:543–553.
- 662 Guo, L., Wang, X., Zhao, M., Huang, C., Li, C., Li, D., Yang, C. J., York, A. M., Xue, W.,  
663 Xu, G., et al. (2018). Stepwise *cis*-regulatory changes in *ZCN8* contribute to maize  
664 flowering-time adaptation. *Curr. Biol.* 28:3005–3015.
- 665 Huang, B. E., George, A. W., Forrest, K. L., Kilian, A., Hayden, M. J., Morell, M. K., and  
666 Cavanagh, C. R. (2012). A multiparent advanced generation inter-cross population  
667 for genetic analysis in wheat. *Plant Biotechnol. J.* 10:826–839.
- 668 Huang, C., Chen, Q., Xu, G., Xu, D., Tian, J. and Tian, F. (2016). Identification and fine  
669 mapping of quantitative trait loci for the number of vascular bundle in maize stem.

- 670 J. Integr. Plant Biol. 58:81–90.
- 671 Huang, C., Sun, H., Xu, D., Chen, Q., Liang, Y., Wang, X., Xu, G., Tian, J., Wang, C.,  
672 Li, D., et al. (2017). *ZmCCT9* enhances maize adaptation to higher latitudes. Proc.  
673 Natl. Acad. Sci. USA 115:E334–E341.
- 674 Hung, H.-Y., Shannon, L. M., Tian, F., Bradbury, P. J., Chen, C., Flint-Garcia, S. A.,  
675 McMullen, M. D., Ware, D., Buckler, E. S., Doebley, J. F., et al. (2012). *ZmCCT* and  
676 the genetic basis of day-length adaptation underlying the postdomestication spread  
677 of maize. Proc. Natl. Acad. Sci. USA 109:E1913–E1921.
- 678 Irish, E.E. and Nelson, T.M. (1993). Development of *tassel seed 2* inflorescences in  
679 maize. Am. J. Bot. 80:292–299.
- 680 Jin, J., Huang, W., Gao, J.P., Yang, J., Shi, M., Zhu, M.Z., Luo, D. and Lin, H.X. (2008).  
681 Genetic control of rice plant architecture under domestication. Nat. Genet.  
682 40:1365–1369.
- 683 Jordan, K. W., Wang, S., He, F., Chao, S., Lun, Y., Paux, E., Sourdille, P., Sherman, J.,  
684 Akhunova, A., Blake, N. K., et al. (2018). The genetic architecture of genome-wide  
685 recombination rate variation in allopolyploid wheat revealed by nested association  
686 mapping. Plant J. 95:1039–1054.
- 687 King, E. G., Merkes, C. M., McNeil, C. L., Hooper, S. R., Sen, S., Broman, K. W., Long,  
688 A. D., and Macdonald, S. J. (2012). Genetic dissection of a model complex trait  
689 using the *Drosophila* Synthetic Population Resource. Genome Res. 22:1558–1566.
- 690 Kover, P. X., Valdar, W., Trakalo, J., Scarcelli, N., Ehrenreich, I. M., Purugganan, M. D.,  
691 Durrant, C., and Mott, R. (2009). A multiparent advanced generation inter-cross to  
692 fine-map quantitative traits in *Arabidopsis thaliana*. PLoS Genet. 5:e1000551.
- 693 Kremling, K.A., Chen, S.Y., Su, M.H., Lepak, N.K., Romay, M.C., Swarts, K.L., Lu, F.,  
694 Lorant, A., Bradbury, P.J. and Buckler, E.S. (2018). Dysregulation of expression  
695 correlates with rare-allele burden and fitness loss in maize. Nature 555:520–523.
- 696 Kump, K. L., Bradbury, P. J., Wisser, R. J., Buckler, E. S., Belcher, A. R., Oropeza-  
697 Rosas, M. A., Zwonitzer, J. C., Kresovich, S., McMullen, M. D., Ware, D., et al.  
698 (2011). Genome-wide association study of quantitative resistance to southern leaf  
699 blight in the maize nested association mapping population. Nat. Genet. 43:163–  
700 168.
- 701 Lang, Z., Wills, D. M., Lemmon, Z. H., Shannon, L. M., Bukowski, R., Wu, Y., Messing,  
702 J., and Doebley, J. F. (2014). Defining the role of *prolamin-box binding factor1* gene  
703 during maize domestication. J. Hered. 105:576–582.
- 704 Leiboff, S., DeAllie, C.K. and Scanlon, M.J. (2016). Modeling the morphometric  
705 evolution of the maize shoot apical meristem. Front. Plant Sci. 7:1651.
- 706 Liang, Y., Liu, Q., Wang, X., Huang, C., Xu, G., Hey, S., Lin, H. Y., Li, C., Xu, D., Wu,  
707 L., et al. (2019). *ZmMADS69* functions as a flowering activator through the  
708 *ZmRap2.7-ZCN8* regulatory module and contributes to maize flowering time



- 709 adaptation. *New Phytol.* 221:2335–2347.
- 710 Li, D., Wang, X., Zhang, X., Chen, Q., Xu, G., Xu, D., Wang, C., Liang, Y., Wu, L.,  
711 Huang, C., et al. (2016). The genetic architecture of leaf number and its genetic  
712 relationship to flowering time in maize. *New Phytol.* 210:256–268.
- 713 Lin, Z., Li, X., Shannon, L. M., Yeh, C. T., Wang, M. L., Bai, G., Peng, Z., Li, J., Trick, H.  
714 N., Clemente, T. E., et al. (2012). Parallel domestication of the *Shattering1* genes in  
715 cereals. *Nat. Genet.* 44:720–724.
- 716 Liu, L., Du, Y., Shen, X., Li, M., Sun, W., Huang, J., Liu, Z., Tao, Y., Zheng, Y., Yan, J.,  
717 et al. (2015). *KRN4* controls quantitative variation in maize kernel row number.  
718 *PLoS Genet.* 11:e1005670.
- 719 Mackay, I. J., Bansept-basler, P., Barber, T., Bentley, A. R., Cockram, J., Gosman, N.,  
720 Horsnell, R., Howells, R., Sullivan, D. M. O., Rose, G. A., et al. (2014). An eight-  
721 parent multiparent advanced generation inter-cross population for winter-sown  
722 wheat: creation, properties, and validation. *G3 (Bethesda)* 4:1603–1610.
- 723 Maurer, A., Draba, V., Jiang, Y., Schnaithmann, F., Sharma, R., Schumann, E., Kilian,  
724 B., Reif, J. C., and Pillen, K. (2015). Modelling the genetic architecture of flowering  
725 time control in barley through nested association mapping. *BMC Genomics* 16:1–  
726 12.
- 727 Meng, X., Muszynski, M. G., and Danilevskaya, O. N. (2011). The *FT*-like *ZCN8* gene  
728 functions as a floral activator and is involved in photoperiod sensitivity in maize.  
729 *Plant Cell* 23:942–960.
- 730 Morohashi, K., Casas, M. I., Ferreyra, M. L. F., Mejía-Guerra, M. K., Pourcel, L., Yilmaz,  
731 A., Feller, A., Carvalho, B., Emiliani, J., Rodriguez, E., et al. (2012). A genome-wide  
732 regulatory framework identifies maize *Pericarp Color1* controlled genes. *Plant Cell*  
733 24:2745–2764.
- 734 Nice, L. M., Steffenson, B. J., Brown-Guedira, G. L., Akhunov, E. D., Liu, C., Kono, T. J.  
735 Y., Morrell, P. L., Blake, T. K., Horsley, R. D., Smith, K. P., et al. (2016).  
736 Development and genetic characterization of an advanced backcross-nested  
737 association mapping (AB-NAM) population of wild x cultivated barley. *Genetics*  
738 203:1453–1467.
- 739 Pautler, M., Eveland, A. L., LaRue, T., Yang, F., Weeks, R., Lunde, C., Je, B. II, Meeley,  
740 R., Komatsu, M., Vollbrecht, E., et al. (2015). *FASCIATED EAR4* encodes a bZIP  
741 transcription factor that regulates shoot meristem size in maize. *Plant Cell* 27:104–  
742 120.
- 743 Schmidt, R.J., Veit, B., Mandel, M.A., Mena, M., Hake, S. and Yanofsky, M.F. (1993).  
744 Identification and molecular characterization of *ZAG1*, the maize homolog of the  
745 *Arabidopsis* floral homeotic gene *AGAMOUS*. *Plant Cell* 5:729–737.
- 746 Shannon, L.M. (2012). The genetic architecture of maize domestication and range  
747 expansion. [PhD Dissertation] The University of Wisconsin-Madison.

- 748 Studer, A. J., Wang, H., and Doebley, J. F. (2017). Selection during maize  
749 domestication targeted a gene network controlling plant and inflorescence  
750 architecture. *Genetics* 207:755–765.
- 751 Tan, L., Li, X., Liu, F., Sun, X., Li, C., Zhu, Z., Fu, Y., Cai, H., Wang, X., Xie, D., et al.  
752 (2008). Control of a key transition from prostrate to erect growth in rice  
753 domestication. *Nat. Genet.* 40:1360–1364.
- 754 Theissen, G., Becker, A., Di Rosa, A., Kanno, A., Kim, J.T., Münster, T., Winter, K.U.  
755 and Saedler, H. (2000). A short history of MADS-box genes in plants. *Plant*  
756 *Molecular Evolution* pp.115–149. Springer, Dordrecht.
- 757 Tian, F., Bradbury, P. J., Brown, P. J., Hung, H., Sun, Q., Flint-Garcia, S., Rocheford, T.  
758 R., McMullen, M. D., Holland, J. B., and Buckler, E. S. (2011). Genome-wide  
759 association study of leaf architecture in the maize nested association mapping  
760 population. *Nat. Genet.* 43:159–162.
- 761 Vollbrecht, E., Springer, P. S., Goh, L., Buckler IV, E. S., and Martienssen, R. (2005).  
762 Architecture of floral branch systems in maize and related grasses. *Nature*  
763 436:1119–1126.
- 764 Wang, H., Nussbaum-Wagler, T., Li, B., Zhao, Q., Vigouroux, Y., Faller, M., Bomblies,  
765 K., Lukens, L., and Doebley, J. F. (2005). The origin of the naked grains of maize.  
766 *Nature* 436:714–719.
- 767 Wang, X., Chen, Q., Wu, Y., Lemmon, Z. H., Xu, G., Huang, C., Liang, Y., Xu, D., Li, D.,  
768 Doebley, J. F., et al. (2018). Genome-wide analysis of transcriptional variability in a  
769 large maize-teosinte population. *Mol. Plant* 11:443–459.
- 770 Whipple, C. J., Hall, D. H., DeBlasio, S., Taguchi-Shiobara, F., Schmidt, R. J., and  
771 Jackson, D. P. (2010). A conserved mechanism of bract suppression in the grass  
772 family. *Plant Cell* 22:565–578.
- 773 Whipple, C.J., Kebrom, T.H., Weber, A.L., Yang, F., Hall, D., Meeley, R., Schmidt, R.,  
774 Doebley, J., Brutnell, T.P. and Jackson, D.P. (2011). *grassy tillers 1* promotes apical  
775 dominance in maize and responds to shade signals in the grasses. *Proc. Natl.*  
776 *Acad. Sci. USA* 108:E506–E512.
- 777 Wills, D. M., Fang, Z., York, A. M., Holland, J. B., and Doebley, J. F. (2017). Defining  
778 the role of the MADS-box gene, *Zea Agamous-like 1*, a target of selection during  
779 maize domestication. *J. Hered.* 109:333–338.
- 780 Wills, D. M., Whipple, C. J., Takuno, S., Kursel, L. E., Shannon, L. M., Ross-Ibarra, J.,  
781 and Doebley, J. F. (2013). From many, one: genetic control of prolificacy during  
782 maize domestication. *PLoS Genet.* 9:e1003604.
- 783 Xavier, A., Jarquin, D., Howard, R., Ramasubramanian, V., Specht, J. E., Graef, G. L.,  
784 Beavis, W. D., Diers, B. W., Song, Q., Cregan, P., et al. (2018). Genome-wide  
785 analysis of grain yield stability and environmental interactions in a multiparental  
786 soybean population. *G3 (Bethesda)* 8:519–529.

- 787 Xiao, Y., Tong, H., Yang, X., Xu, S., Pan, Q., Qiao, F., Raihan, M. S., Luo, Y., Liu, H.,  
788 Zhang, X., et al. (2016). Genome-wide dissection of the maize ear genetic  
789 architecture using multiple populations. *New Phytol.* 210:1095–1106.
- 790 Xu, D., Wang, X., Huang, C., Xu, G., Liang, Y., Chen, Q., Wang, C., Li, D., Tian, J., Wu,  
791 L., et al. (2017a). *Glossy15* plays an important role in the divergence of the  
792 vegetative transition between maize and its progenitor, teosinte. *Mol. Plant*  
793 10:1579–1583.
- 794 Xu, G., Wang, X., Huang, C., Xu, D., Li, D., Tian, J., Chen, Q., Wang, C., Liang, Y., Wu,  
795 Y., et al. (2017b). Complex genetic architecture underlies maize tassel  
796 domestication. *New Phytol.* 214:852–864.
- 797 Yang, C.J. (2018). Dissection of the genetic architecture of domestication traits in maize  
798 and its ancestor teosinte. [PhD Dissertation] The University of Wisconsin-Madison.
- 799 Yang, Q., Li, Z., Li, W., Ku, L., Wang, C., Ye, J., Li, K., Yang, N., Li, Y., Zhong, T., et al.  
800 (2013). CACTA-like transposable element in *ZmCCT* attenuated photoperiod  
801 sensitivity and accelerated the postdomestication spread of maize. *Proc. Natl.*  
802 *Acad. Sci. USA* 110:16969–16974.
- 803 Yu, J., Holland, J. B., McMullen, M. D., and Buckler, E. S. (2008). Genetic design and  
804 statistical power of nested association mapping in maize. *Genetics* 178:539–551.
- 805 Zhang, Z., Zhang, X., Lin, Z., Wang, J., Xu, M., Lai, J., Yu, J., and Lin, Z. (2018). The  
806 genetic architecture of nodal root number in maize. *Plant J.* 93:1032–1044.
- 807 Zhao, Q., Weber, A. L., McMullen, M. D., Guill, K., and Doebley, J. (2011). MADS-box  
808 genes of maize: frequent targets of selection during domestication. *Genet. Res.*  
809 93:65–75.
- 810 Zhao, H., Sun, Z., Wang, J., Huang, H., Kocher, J. P., and Wang, L. (2014). CrossMap:  
811 a versatile tool for coordinate conversion between genome assemblies.  
812 *Bioinformatics* 30:1006–1007.
- 813

814 **Figures**

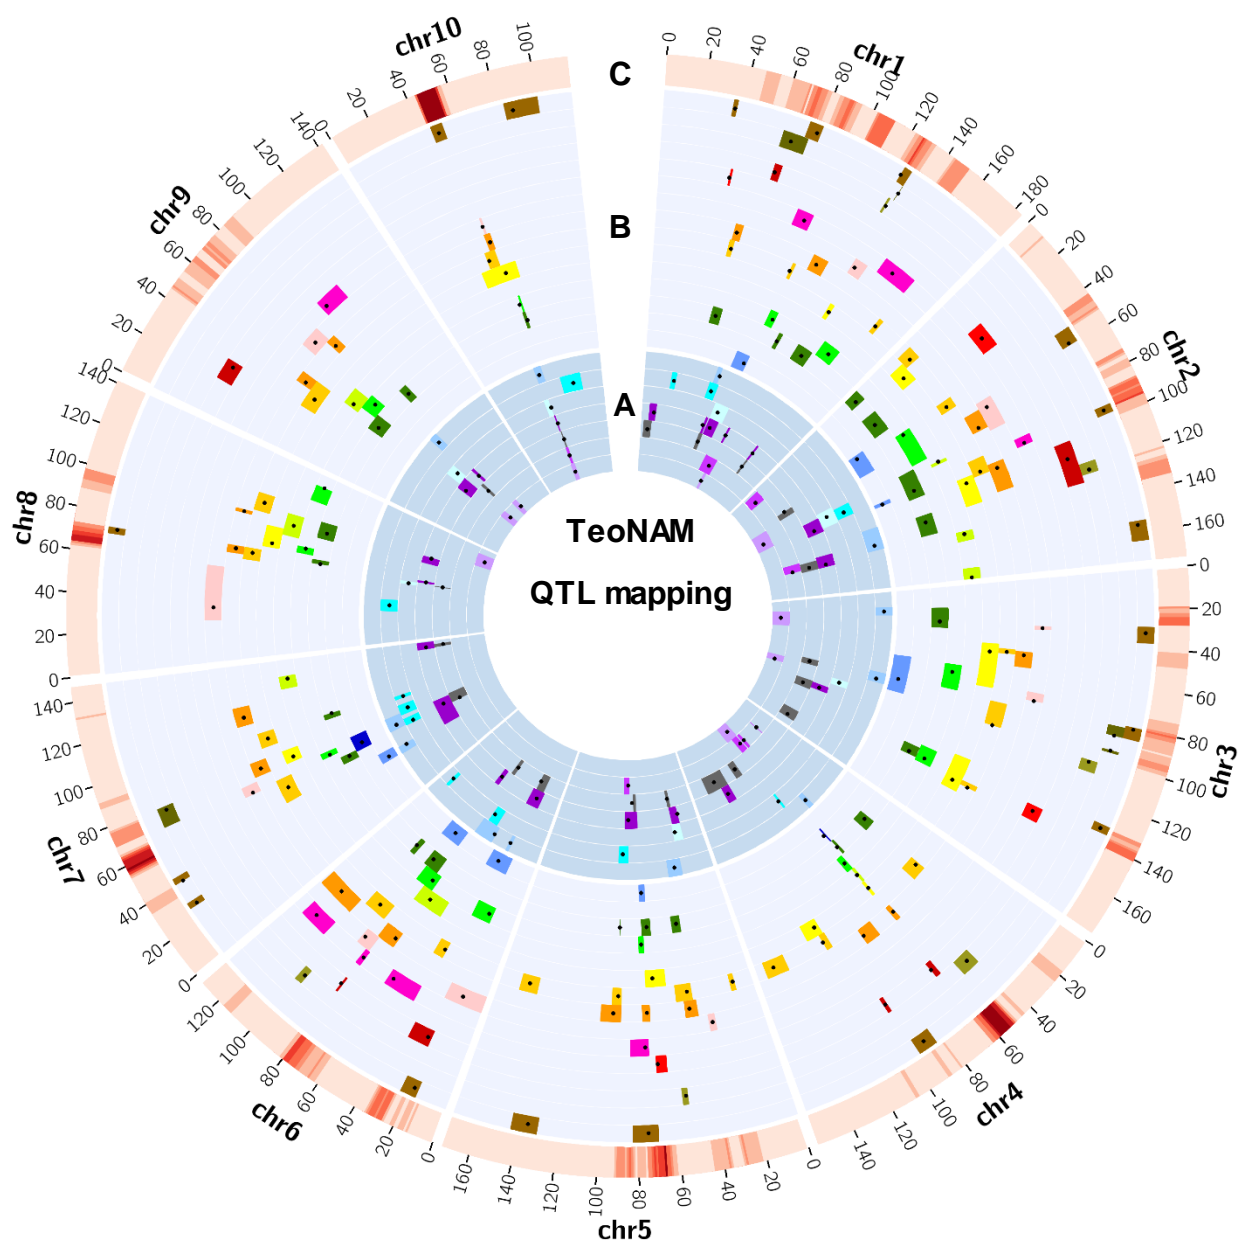

815  
816 **Figure 1** Genomic distribution of QTLs for all 22 traits in TeoNAM. The 22 agronomic  
817 (A) and domestication (B) traits are plotted in layers with different background colors,  
818 following the order of ASI, BARE, DTA, DTS, PLHT, TBN, YEPE, CULM, EB, ED, EL,  
819 GLCO, GLUM, KRN, KW, LFLN, LFWD, PROL, REPE, SHN, STAM and TILN  
820 outwards. Black dots indicate QTL peaks detected by JLM and colored bars indicate the  
821 support interval of QTLs for different traits. The heat map in the outmost layer (C) shows  
822 the number of QTL peaks using a sliding window of 10 cM and 1 cM steps, where low to  
823 high density of QTLs (0-12) are shown in light to dark red, respectively.

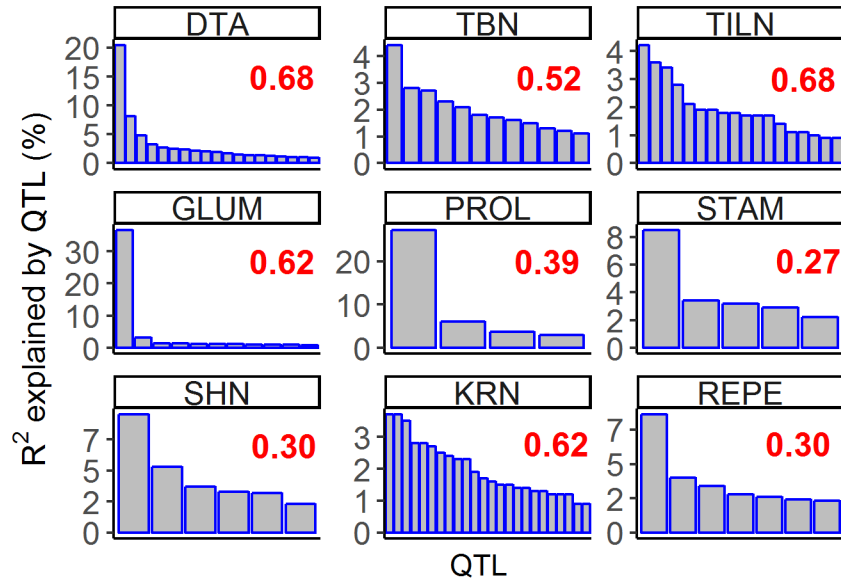

824

825 **Figure 2** Distinct genetic architectures for different traits. The nine traits that we focused  
826 in the main text are shown. The horizontal axis indicates QTLs and the vertical axis  
827 indicates the phenotypic variation explained by each QTL ( $R^2$ ). Red number indicates  
828 variance explained by the QTL model for each trait. The  $R^2$  distribution for 13 additional  
829 traits can be found in Figure S28.

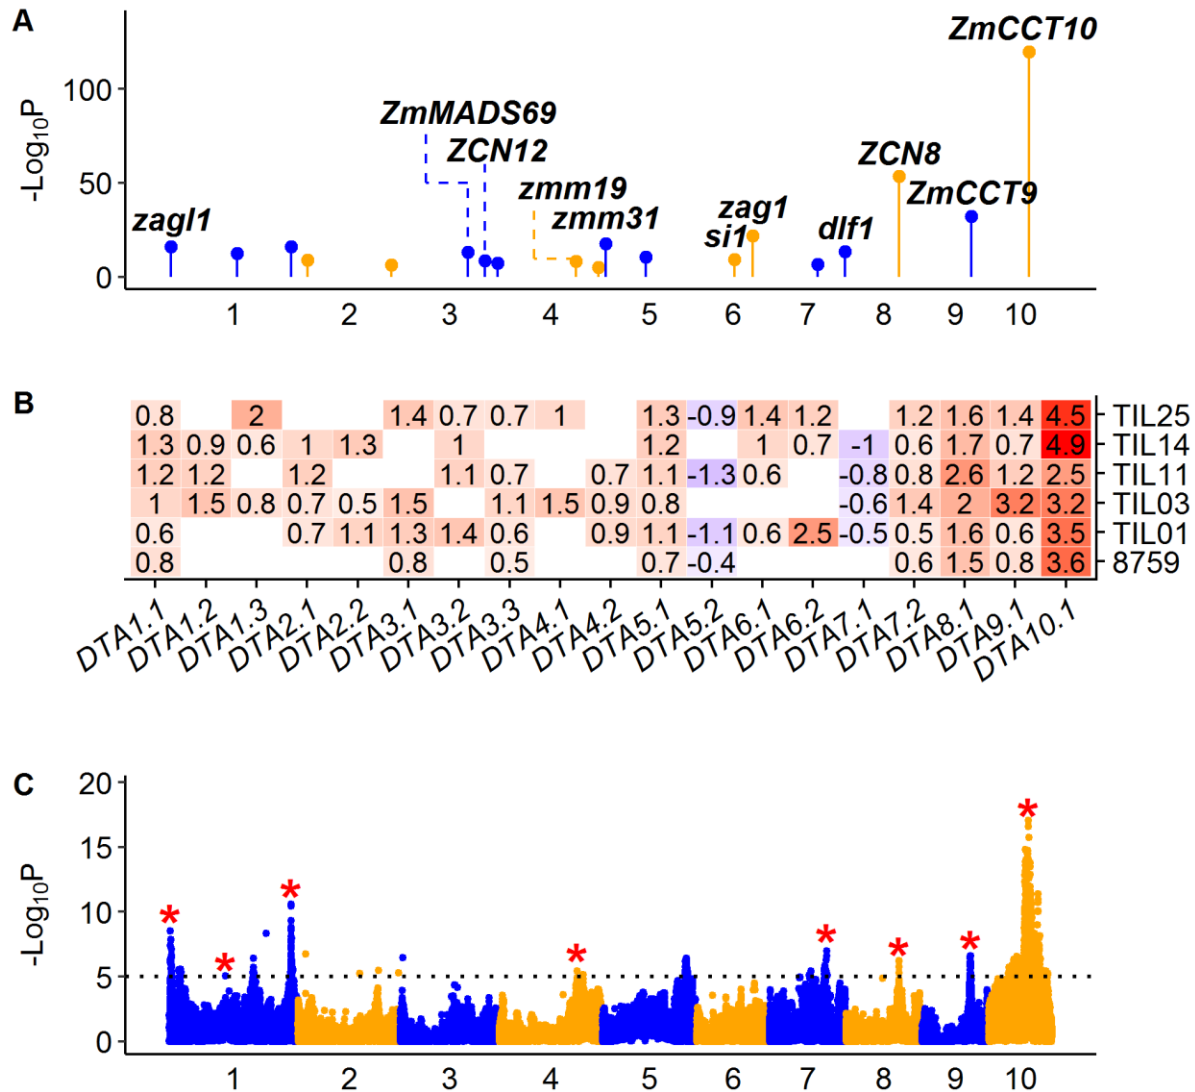

830

831 **Figure 3.** QTL characterization for agronomic trait DTA. (A) Genomic distribution of 19  
 832 QTLs for DTA detected by JLM. The known candidate genes are shown above the  
 833 corresponding QTLs in bold italic. (B) Heat map shows additive allele effects of teosinte  
 834 relative to maize in number of days for 19 QTLs detected by JLM. The allele effect of  
 835 teosinte parent 8759 was estimated from the 866 maize-teosinte BC<sub>2</sub>S<sub>3</sub> RILs (Shannon  
 836 2012). Insignificant effects are shown as blank. Red and blue color indicates that the  
 837 teosinte allele delays or promotes flowering time, respectively. (C) Manhattan plot  
 838 shows QTLs detected by GWAS. The significance threshold at LOD=5 is indicated by  
 839 black dotted line. The red stars indicate GWAS signals overlapping with QTLs by JLM.  
 840 In (A) and (C), chromosomes in odd and even numbers are shown in blue and orange  
 841 colors, respectively.

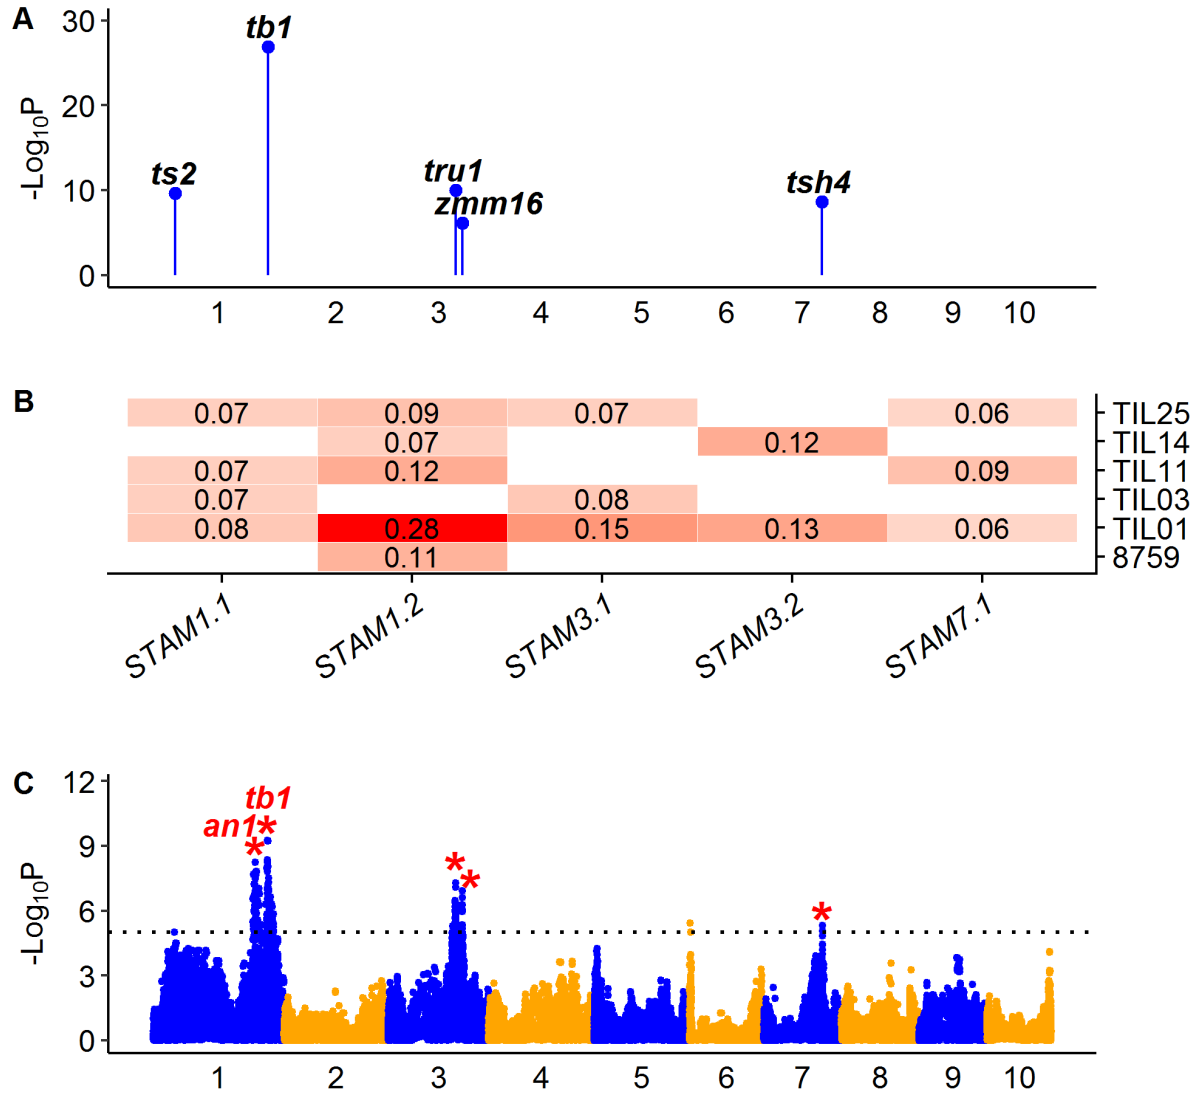

842

843 **Figure 4** QTL characterization for domestication trait STAM. (A) Genomic distribution of  
 844 five QTLs for STAM detected by JLM. The known candidate genes are shown above  
 845 the corresponding QTLs in bold italic. (B) Heat map shows additive allele effects of  
 846 teosinte relative to maize for five QTLs detected by JLM. The allele effect of teosinte  
 847 parent 8759 was estimated from the 866 maize-teosinte BC<sub>2</sub>S<sub>3</sub> RILs (Shannon 2012).  
 848 Insignificant effects are shown as blank. The teosinte genotypes at all QTLs consistently  
 849 contribute to a staminate lateral inflorescence. (C) Manhattan plot shows QTLs detected  
 850 by GWAS. The significance threshold at LOD=5 is indicated by black dotted line. The  
 851 red stars indicate GWAS signals overlapping with QTLs by JLM. In (A) and (C),  
 852 chromosomes in odd and even numbers are shown in blue and orange colors,  
 853 respectively.

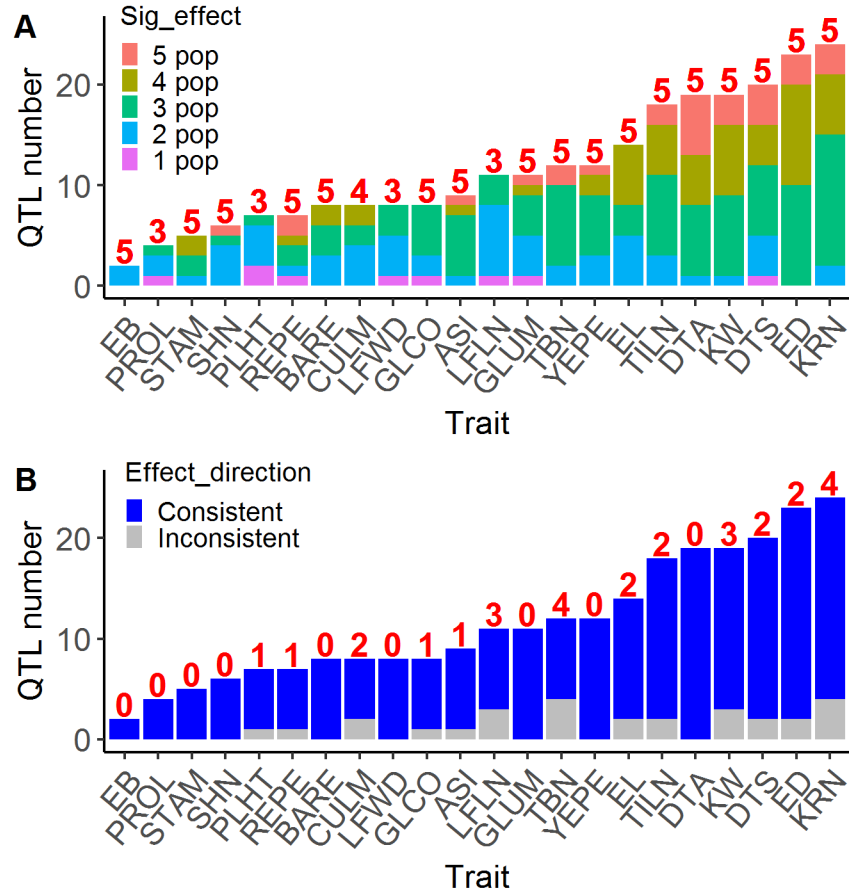

854

855 **Figure 5** QTL detection and effects for all 22 traits. (A) Summary of QTL detection for  
 856 all 22 traits. The number above the bar indicates the number of subpopulations in which  
 857 the trait was scored. (B) Summary of QTL effect direction for all 22 traits. The number  
 858 above the bar indicates the number of QTLs in which a teosinte allele was associated  
 859 with the maize phenotype was detected.

860



861 **Tables**

| <b>Table 1. TeoNAM genetic map statistics</b> |                 |                    |                    |                |              |                |                         |                     |
|-----------------------------------------------|-----------------|--------------------|--------------------|----------------|--------------|----------------|-------------------------|---------------------|
| <b>Population</b>                             | <b>No. RILs</b> | <b>No. Markers</b> | <b>Length (cM)</b> | <b>No. XOs</b> | <b>cM/Mb</b> | <b>W22 (%)</b> | <b>Heterozygous (%)</b> | <b>Teosinte (%)</b> |
| W22xTIL01                                     | 223             | 13,088             | 1457               | 6,291          | 0.71         | 75.8           | 7.7                     | 16.0                |
| W22xTIL03                                     | 270             | 16,109             | 1596               | 8,505          | 0.78         | 75.5           | 8.1                     | 16.2                |
| W22xTIL11                                     | 219             | 13,187             | 1398               | 5,745          | 0.68         | 76.3           | 7.6                     | 15.6                |
| W22xTIL14                                     | 235             | 11,395             | 1348               | 6,462          | 0.65         | 75.7           | 9.4                     | 14.6                |
| W22xTIL25                                     | 310             | 14,884             | 1506               | 8,877          | 0.73         | 77.6           | 8.0                     | 14.2                |
| Composite                                     | 1257            | 51,544             | 1540               | 35,880         | 0.75         | 76.6           | 8.1                     | 15.0                |

862

863

| <b>Table 2. List of 22 domestication and agronomic traits scored</b> |                     |              |                 |
|----------------------------------------------------------------------|---------------------|--------------|-----------------|
| <b>Trait</b>                                                         | <b>Abbreviation</b> | <b>Units</b> | <b>Category</b> |
| Anthesis-Silk Interval                                               | ASI                 | count        | Agronomic       |
| Barren Ear Base                                                      | BARE                | score        | Agronomic       |
| Days to Anthesis                                                     | DTA                 | count        | Agronomic       |
| Days to Silk                                                         | DTS                 | count        | Agronomic       |
| Plant Height                                                         | PLHT                | cm           | Agronomic       |
| Tassel Branch Number                                                 | TBN                 | count        | Agronomic       |
| Yellow Pericarp                                                      | YEPE                | score        | Agronomic       |
| Culm Diameter                                                        | CULM                | mm           | Domestication   |
| Ear Branch Number                                                    | EB                  | count        | Domestication   |
| Ear Diameter                                                         | ED                  | mm           | Domestication   |
| Ear Length                                                           | EL                  | cm           | Domestication   |
| Glume Color                                                          | GLCO                | score        | Domestication   |
| Glume Score                                                          | GLUM                | score        | Domestication   |
| Kernel Row Number                                                    | KRN                 | count        | Domestication   |
| Kernel Weight                                                        | KW                  | g            | Domestication   |
| Leaf Length                                                          | LFLN                | cm           | Domestication   |
| Leaf Width                                                           | LFWD                | cm           | Domestication   |
| Prolificacy                                                          | PROL                | binary       | Domestication   |
| Red Pericarp                                                         | REPE                | score        | Domestication   |
| Shattering                                                           | SHN                 | count        | Domestication   |
| Staminate Spikelet                                                   | STAM                | score        | Domestication   |
| Tiller Number                                                        | TILN                | count        | Domestication   |

864
